# Supplementary material for: Colloidal Synthesis and Optical Properties of Cs2CuCl4 Nanocrystals
Source: MDPI journal article supplement (doi:10.3390/cryst13060864), 2023-05-24
Supplement: s1 [file s1]

Archive with 1 entries (1 files):
- crystals-2409220-supplementary.pdf
