# Supplementary material for: Colloidal Synthesis and Optical Properties of Cs2CuCl4 Nanocrystals
Source: MDPI journal article supplement (doi:10.3390/cryst13060864), 2023-05-24
Supplement: s1 [file s1 › crystals-2409220-supplementary.pdf]

# Supporting Information

## Colloidal Synthesis and Optical Properties of Cs<sub>2</sub>CuCl<sub>4</sub> Nanocrystals

Wanying Gu <sup>1,†</sup>, Yicheng Zeng <sup>1,†</sup>, Yuan Deng <sup>1</sup>, Pan Huang <sup>1</sup>, Geyu Jin <sup>1</sup>, Fangze Liu <sup>2</sup>,  
Jing Wei <sup>1</sup> and Hongbo Li <sup>1,\*</sup>

<sup>1</sup> School of Materials Science and Engineering, Beijing Institute of Technology, Beijing 100081, China

<sup>2</sup> Advanced Research Institute of Multidisciplinary Sciences, Beijing Institute of Technology, Beijing 100081, China

\* Correspondence: hongbo.li@bit.edu.cn

† These authors contributed equally to this work.

**Table S1.** Summary of the optical performance of the lead and lead-free perovskite NCs.

| Emitting Materials                                                                | PL peak | Fabrication Technology     | PLQY   | Ref.      |
|-----------------------------------------------------------------------------------|---------|----------------------------|--------|-----------|
| CsPb(Cl/Br) <sub>3</sub> quantum dots                                             | 452 nm  | Hot injection              | 60%    | 11        |
| CsPb(Cl/Br) <sub>3</sub> quantum dots                                             | 465 nm  | Hot injection              | 100%   | 12        |
| Cs <sub>3</sub> Bi <sub>2</sub> Br <sub>9</sub> quantum dots                      | 414 nm  | Modified recrystallization | 22%    | 26        |
| Cs <sub>3</sub> Sb <sub>2</sub> Br <sub>9</sub> quantum dots                      | 408 nm  | Modified recrystallization | 51.2%  | 28        |
| Cs <sub>3</sub> Cu <sub>2</sub> I <sub>5</sub> NCs                                | 441 nm  | Hot injection              | 87%    | 16        |
| Cs <sub>2</sub> CuCl <sub>4</sub> quantum dots                                    | 385 nm  | Modified recrystallization | 51.8%  | 35        |
| Cs <sub>2</sub> CuCl <sub>4</sub> nanoplates                                      | 434 nm  | Modified recrystallization | 31.52% | 36        |
| A mixture of Cs <sub>2</sub> CuCl <sub>4</sub> and CsCuCl <sub>3</sub> nanoplates | 527 nm  | Hot injection              | 14%    | 37        |
| Ag: Cs <sub>2</sub> CuCl <sub>4</sub> NCs                                         | 434 nm  | Hot injection              | 42%    | This work |

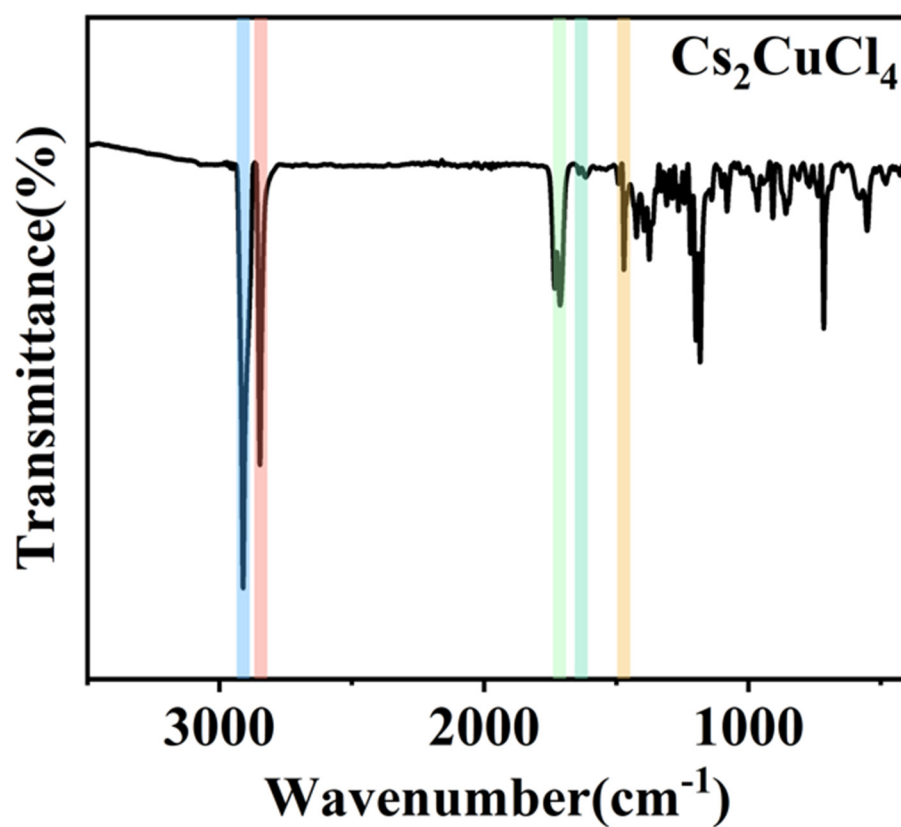

Figure S1. The FTIR spectra of  $\text{Cs}_2\text{CuCl}_4$  NCs.

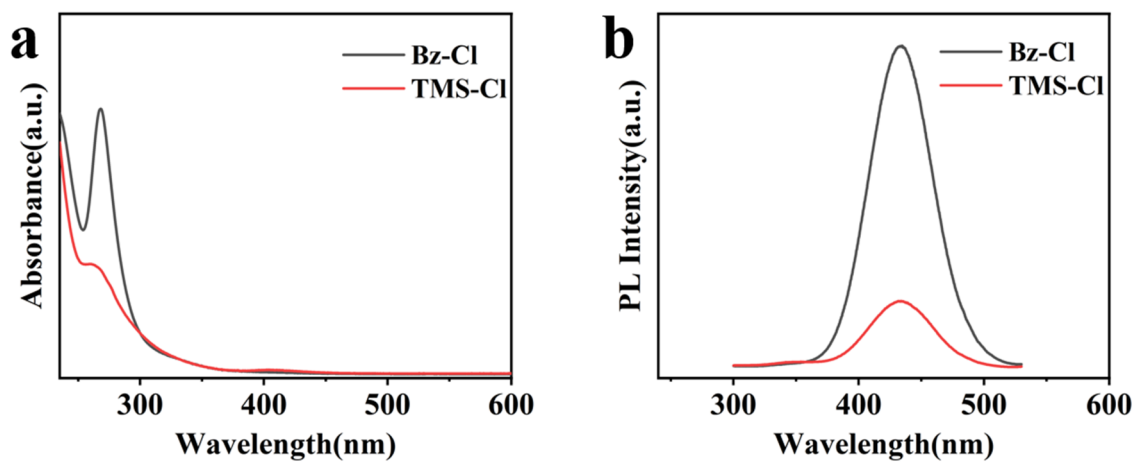

Figure S2. (a) UV-Vis spectra from NCs synthesized using different precursors (Bz-Cl and TMS-Cl). (b) PL spectra for samples synthesized using different precursors (Bz-Cl and TMS-Cl).

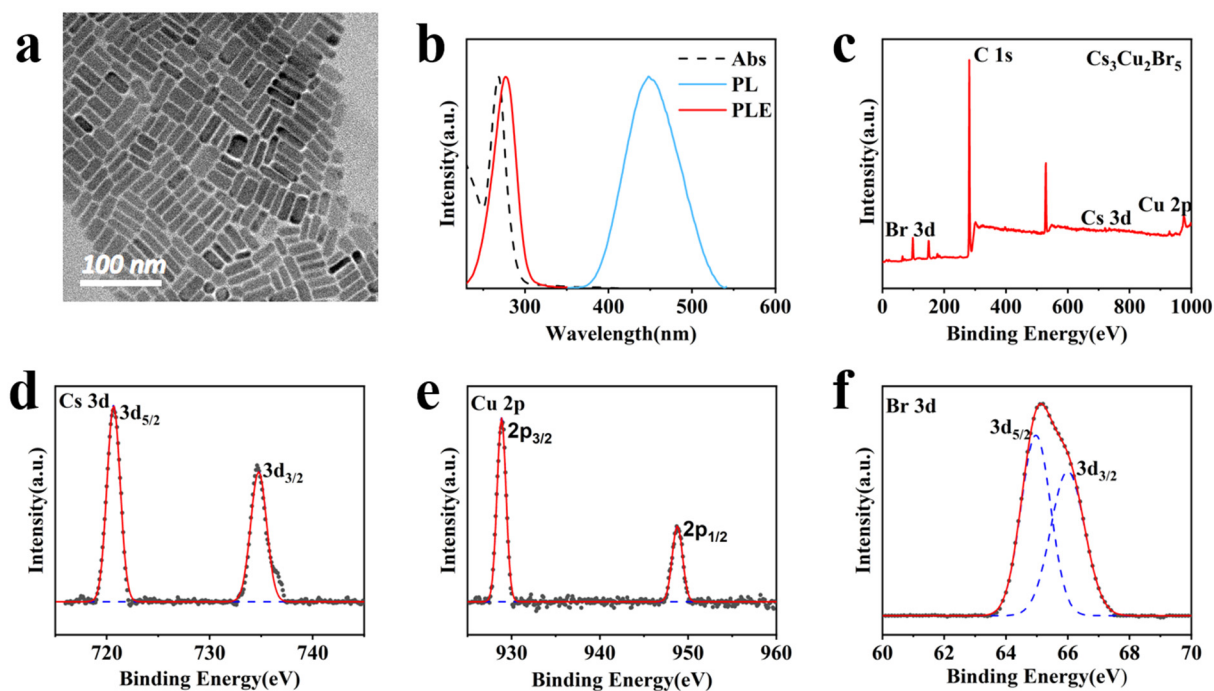

**Figure S3.** (a) TEM images of the  $\text{Cs}_3\text{Cu}_2\text{Br}_5$  NCs. (b) UV-Vis absorption, PLE and PL spectra of  $\text{Cs}_3\text{Cu}_2\text{Br}_5$  NCs. (c) XPS survey scan of  $\text{Cs}_3\text{Cu}_2\text{Br}_5$  NCs. (d,e,f) The high-resolution XPS spectra corresponding to Cs 3d, Cu 2p and Br 3d, respectively.

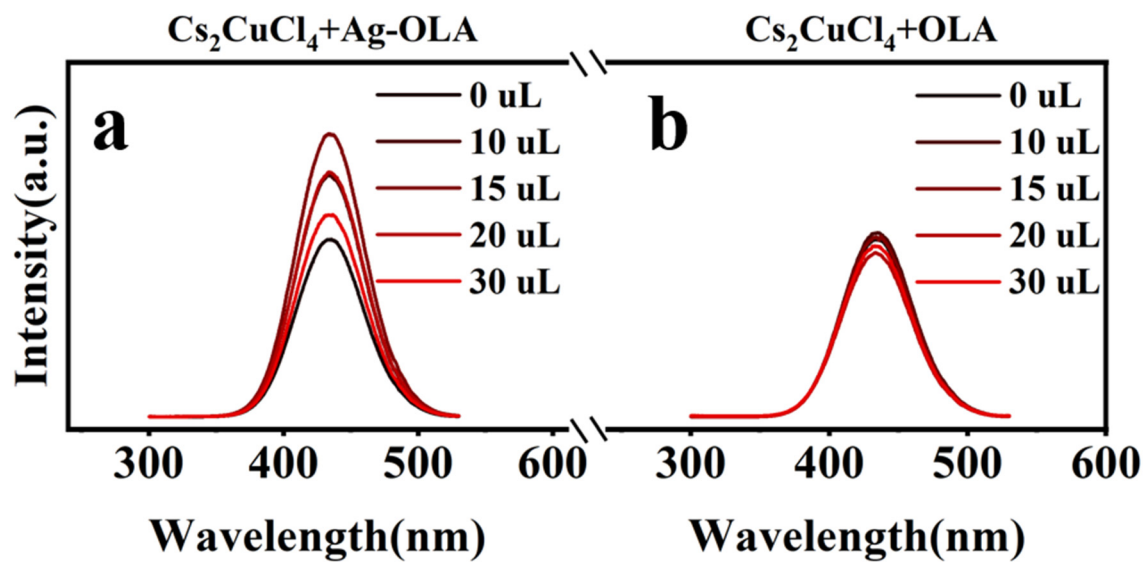

**Figure S4.** (a) PL spectra for  $\text{Cs}_2\text{CuCl}_4$  NCs and Ag-treated samples. (b) PL spectra for  $\text{Cs}_2\text{CuCl}_4$  NCs and  $\text{Cs}_2\text{CuCl}_4$ -OLA.

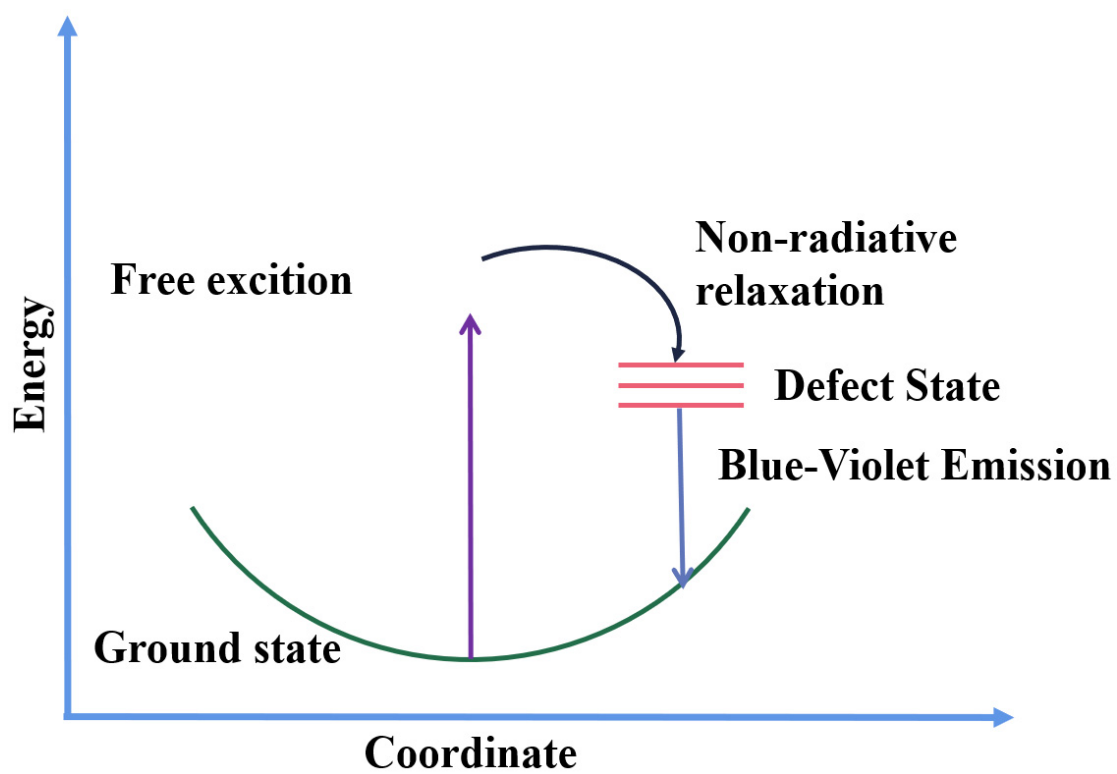

**Figure S5.** Schematic model representing the emission mechanism.
